# Supplementary material
Source: publisher site journal article supplement (https://www.spandidos-publications.com/5113/downloadSupplementary)
Supplement: Supplementary file 1 [file downloadSupplementary]

## Sheet: Table S16
Table SXVI. The correlation of DNase expression and the tumorpurity in different cancer types.
Cancer type	DNASE1	DNASE1L1	DNASE1L2	DNASE1L3	DNASE2	DNASE2B
ACC	0.279844	0.0940604	0.614679	-0.399611	0.00981013	-0.0633374
BLCA	0.321921	-0.0526085	0.314937	-0.514604	-0.161576	-0.0846771
BRCA	0.137819	-0.0836475	0.184734	-0.527509	0.00458797	-0.232069
CESC	0.131152	-0.0215754	0.177411	-0.321241	-0.161469	-0.279214
CHOL	0.131789	-0.11583	0.0718147	-0.353668	-0.047619	-0.384066
COAD	0.185647	0.0600846	0.135663	-0.219763	-0.259556	-0.0482362
DLBC	0.214394	-0.297981	0.53756	-0.229917	-0.595745	-0.420055
ESCA	0.0199348	0.0620991	0.0594233	-0.061193	-0.174589	-0.208906
GBM	0.473439	-0.617042	0.319853	-0.213397	-0.599055	-0.0429994
HNSC	0.139392	-0.0793687	0.0608202	-0.248331	-0.127402	-0.438361
KICH	0.00979021	0.293094	0.326748	-0.383479	0.0951923	-0.322523
KIRC	0.128178	-0.0383507	0.167781	-0.0800147	-0.303003	-0.408755
KIRP	0.356146	-0.0901255	0.276788	-0.395817	-0.576132	-0.564329
LAML	0.125643	-0.457093	0.138383	-0.31592	-0.122363	0.113557
LGG	0.302119	-0.438017	0.263729	-0.126647	-0.607283	-0.434029
LIHC	0.0274241	-0.117833	0.208242	-0.230743	-0.0587419	-0.348244
LUAD	0.170804	-0.116967	0.0574986	-0.362656	-0.394499	-0.478842
LUSC	0.197876	-0.205343	0.12123	-0.0720574	-0.124833	-0.472399
MESO	0.40701	-0.0327657	0.00961366	-0.51264	-0.00999104	-0.423435
OV	0.196584	-0.272918	0.078231	-0.439237	-0.038328	-0.286245
PAAD	0.27532	0.209617	0.464834	-0.481395	-0.201331	-0.372645
PCPG	0.43697	0.165493	0.174134	-0.405466	0.040874	-0.279984
PRAD	0.217207	0.176463	0.0586854	-0.658626	-0.264857	0.262475
READ	0.210037	-0.282128	0.0243463	-0.211652	-0.260714	-0.0106509
SARC	0.516761	-0.188226	0.212173	-0.403064	-0.348384	-0.23492
SKCM	0.112167	-0.0629297	0.0966148	-0.593685	-0.281647	-0.122826
STAD	0.166699	-0.0422157	0.267451	-0.361849	-0.316002	-0.321258
TGCT	-0.132348	-0.435027	0.175234	-0.547818	-0.772414	-0.587902
THCA	0.142098	0.19244	0.160902	0.155821	0.329755	-0.381597
THYM	0.109764	0.0105683	-0.117063	-0.39775	-0.039154	0.0130678
UCEC	0.0829033	-0.0188731	0.0111317	-0.564219	0.0168671	-0.228551
UCS	0.338346	-0.179426	0.204511	-0.39542	-0.246685	-0.202619
UVM	0.218847	-0.144843	-0.0525329	-0.682841	-0.52255	-0.499584
